# Supplementary material for: Distinct subdivisions of human medial parietal cortex support recollection of people and places
Source: eLife. 2019 Jul 15;8:e47391. doi: 10.7554/eLife.47391 (PMC6667275; doi:10.7554/eLife.47391)
Supplement: Supplementary file 1. — Supplementary file 1a: Statistical analysis of behavioral responses collected directly after the memory experiment. Data are provided for both subjective vividness and the proportion of missed trials. Table includes F-values, degrees of freedom (df), p-values and estimates of effect size using partial eta squared. In each case, a two-way repeated measures ANOVA was conducted with Category (Places, People) and Familiarity (Famous, Personal) as within-participant factors. In the case of vividness ratings, both main effects of Category and Familiarity were significant, reflecting on average higher vividness ratings for the recall of people over places and for personal over famous stimuli. The significant Category by Familiarity interaction reflects a larger familiarity difference (Personal >Famous) during recall of places over people. For the proportion of missed trials, neither main effect was significant, but their interaction was. This interaction is driven by more missed trials for famous places than people, but fewer missed trials for personal scenes than people. Supplementary file 1b: Statistical analysis of memory effects in MPCv and MPCd. Table includes Fvalues, degrees of freedom (df), p-values and estimates of effect size using partial eta squared. MPCv showed significant main effects of Category, Familiarity and Hemisphere. These were qualified by a significant three-way interaction, reflecting a larger familiarity difference (Personal >Famous) between categories (Places > People) in the right over left hemisphere. MPCd also showed significant main effects but did not show a significant three-way interaction. Importantly, however, MPCd did show the predicted Category by Familiarity interaction, which reflects a larger familiarity difference for the recall of people over places. Supplementary file 1c: Statistical analysis of memory effects in ROI 1. Table includes Fvalues, degrees of freedom (df), p-values and estimates of effect size using partial eta square [file elife-47391-supp1.xlsx]

## Sheet: Supplementary File 1a
2-way ANOVA: Vividness
	F-value	df	p-value	Partial eta squared
Category	23.35	1, 23	0.0007	0.5
Familiarity	53.93	1, 23	1.80 -7	0.7
Category x Familiarity	24.97	1, 23	0.0004	0.52
2-way ANOVA: Proportion Missed Trials
Category	1.46	1, 23	0.23	0.06
Familiarity	1.64	1, 23	0.21	0.07
Category x Familiarity	7.26	1, 23	0.01	0.24

## Sheet: Supplementary File 1b
3-way ANOVA: MPCv
	F-value	df	p-value	Partial eta squared
Category	75.4	1, 23	1.02 -8	0.76
Familiarity	123.86	1, 23	6.78 -11	0.85
Hemisphere	4.92	1, 23	0.03	0.17
Category x Familiarity	41.55	1, 23	1e-06	0.64
Category x Hemisphere	1.08	1, 23	0.31	0.04
Familiarity x Hemisphere	5.49	1, 23	0.03	0.19
Category x Familiarity x Hemisphere	7.19	1, 23	0.01	0.24
2-way ANOVA: Left Hemisphere
Category	67.72	1, 23	2.63 -8	0.75
Familiarity	121.27	1, 23	1.20 -10	0.84
Category x Familiarity	31.19	1, 23	1e-05	0.56
2-way ANOVA: Right Hemisphere
Category	78.25	1, 23	7.32 -9	0.77
Familiarity	111.74	1, 23	2.65 -10	0.83
Category x Familiarity	49.51	1, 23	3.59 -7	0.68
3-way ANOVA: MPCd
Category	47.53	1, 23	4.98 -7	0.67
Familiarity	82.33	1, 23	4.62 -9	0.78
Hemisphere	10.7	1, 23	0.003	0.32
Category x Familiarity	3.79	1, 23	0.01	0.25
Category x Hemisphere	9.74	1, 23	0.005	0.28
Familiarity x Hemisphere	1.01	1, 23	0.32	0.42
Category x Familiarity x Hemisphere	0.22	1, 23	0.64	0.01

## Sheet: Supplementary File 1c
3-way ANOVA: ROI 1
	F-value	df	p-value	Partial eta squared
Category	62.97	1, 23	4.92 -8	0.73
Familiarity	93.82	1, 23	1.39 -9	0.83
Hemisphere	0.07	1, 23	0.78	0.003
Category x Familiarity	32.39	1, 23	9.01-6	0.58
Category x Hemisphere	12.42	1, 23	0.002	0.35
Familiarity x Hemisphere	10.05	1, 23	0.004	0.3
Category x Familiarity x Hemisphere	10.52	1, 23	0.004	0.31
2-way ANOVA: Left Hemisphere
Category	60.24	1, 23	7.17 -8	0.72
Familiarity	80.37	1, 23	5.75 -9	0.78
Category x Familiarity	21.52	1, 23	0.0001	0.48
2-way ANOVA: Right Hemisphere
Category	63.18	1, 23	4.78 -8	0.73
Familiarity	103.75	1, 23	5.40 -10	0.82
Category x Familiarity	43.16	1, 23	1e-05	0.68

## Sheet: Supplementary File 1d
3-way ANOVA: ROI 2
	F-value	df	p-value	Partial eta squared
Category	55.52	1, 23	1.42 -7	0.7
Familiarity	78.95	1, 23	6.76 -9	0.77
Hemisphere	6.42	1, 23	0.01	0.22
Category x Familiarity	17.19	1, 23	0.0003	0.42
Category x Hemisphere	5.45	1, 23	0.03	0.19
Familiarity x Hemisphere	1.19	1, 23	0.28	0.05
Category x Familiarity x Hemisphere	0.13	1, 23	0.72	0.006

## Sheet: Supplementary File 1e
3-way ANOVA: ROI 3
	F-value	df	p-value	Partial eta squared
Category	45.31	1, 23	7.25 -7	0.66
Familiarity	29.56	1, 23	1e-05	0.56
Hemisphere	0.24	1, 23	0.62	0.1
Category x Familiarity	6.93	1, 23	0.02	0.23
Category x Hemisphere	3.19	1, 23	0.08	0.12
Familiarity x Hemisphere	1.24	1, 23	0.27	0.05
Category x Familiarity x Hemisphere	3.47	1, 23	0.07	0.13

## Sheet: Supplementary File 1f
3-way ANOVA: ROI 4
	F-value	df	p-value	Partial eta squared
Category	53.93	1, 23	1.80 -7	0.7
Familiarity	30.84	1, 23	1e-05	0.57
Hemisphere	30.44	1, 23	1e-05	0.57
Category x Familiarity	8.72	1, 23	0.007	0.27
Category x Hemisphere	0.06	1, 23	0.81	0.003
Familiarity x Hemisphere	4.61	1, 23	0.04	0.17
Category x Familiarity x Hemisphere	6.97	1, 23	0.02	0.23
2-way ANOVA: Left Hemisphere
Category	27.12	1, 23	0.0002	0.54
Familiarity	10.6	1, 23	0.003	0.32
Category x Familiarity	2.84	1, 23	0.1	0.11
2-way ANOVA: Right Hemisphere
Category	39.71	1, 23	2e-05	0.63
Familiarity	27.34	1, 23	0.0002	0.54
Category x Familiarity	12.38	1, 23	0.002	0.35

## Sheet: Supplementary File 1g
3-way ANOVA: PPA
	F-value	df	p-value	Partial eta squared
Category	22.33	1, 23	9e-05	0.49
Familiarity	13.02	1, 23	0.001	0.36
Hemisphere	0.44	1, 23	0.51	0.19
Category x Familiarity	14.85	1, 23	0.001	0.39
Category x Hemisphere	0.73	1, 23	0.78	0.003
Familiarity x Hemisphere	0.22	1, 23	0.88	0.001
Category x Familiarity x Hemisphere	0.63	1, 23	0.8	0.003
3-way ANOVA: FFA
Category	9.4	1, 23	0.005	0.29
Familiarity	3.97	1, 23	0.06	0.15
Hemisphere	14.71	1, 23	0.001	0.39
Category x Familiarity	0.32	1, 23	0.58	0.01
Category x Hemisphere	0.27	1, 23	0.61	0.01
Familiarity x Hemisphere	9.95	1, 23	0.004	0.3
Category x Familiarity x Hemisphere	8.36	1, 23	0.008	0.27
2-way ANOVA: Left Hemisphere
Category	9.12	1, 23	0.006	0.28
Familiarity	10.15	1, 23	0.004	0.3
Category x Familiarity	0.42	1, 23	0.52	0.02
2-way ANOVA: Right Hemisphere
Category	7.82	1, 23	0.01	0.25
Familiarity	0.02	1, 23	0.88	0.001
Category x Familiarity	2.8	1, 23	0.11	0.11

## Sheet: Supplementary File 1h
3-way ANOVA: Hippocampus
	F-value	df	p-value	Partial eta squared
Category	5.51	1, 23	0.03	0.19
Familiarity	33.49	1, 23	7e-06	0.59
Hemisphere	0.13	1, 23	0.9	0.001
Category x Familiarity	3.27	1, 23	0.08	0.12
Category x Hemisphere	5.49	1, 23	0.03	0.19
Familiarity x Hemisphere	0.02	1, 23	0.88	0.001
Category x Familiarity x Hemisphere	0.11	1, 23	0.74	0.005
3-way ANOVA: Amygdala
Category	20.77	1, 23	0.0001	0.47
Familiarity	2.91	1, 23	0.1	0.11
Hemisphere	0.16	1, 23	0.9	0.001
Category x Familiarity	0.87	1, 23	0.36	0.04
Category x Hemisphere	0.06	1, 23	0.8	0.003
Familiarity x Hemisphere	0.22	1, 23	0.64	0.01
Category x Familiarity x Hemisphere	2.41	1, 23	0.13	0.09

## Sheet: Supplementary File 1i
3-way ANOVA
	F-value	df	p-value	Partial eta squared
ROI	3.57	1, 64	0.06	0.05
Eccentricity	9.35	1, 64	0.003	0.13
Hemisphere	0.46	1, 64	0.49	0.007
ROI x Eccentricity	43.59	1, 64	1e-05	0.4
ROI x Hemisphere	1.5	1, 64	0.22	0.23
Eccentricity x Hemisphere	3.29	1, 64	0.07	0.04
ROI x Eccentricity x Hemisphere	15.51	1, 64	0.0002	0.19
2-way ANOVA: Left Hemisphere
ROI	5.14	1, 64	0.02	0.07
Eccentricity	10.97	1, 64	0.002	0.15
ROI x Eccentricity	52.52	1, 64	1e-05	0.45
2-way ANOVA: Right Hemisphere
ROI	1.01	1, 64	0.29	0.02
Eccentricity	2.98	1, 64	0.08	0.04
ROI x Eccentricity	16.53	1, 64	0.0001	0.21
